# Supplementary material for: Collaborative Multimodal Writing via Google Docs: Perceptions of French FL Learners
Source: MDPI journal article supplement (doi:10.3390/languages6030140), 2021-08-20
Supplement: s1 [file s1]

Archive with 1 entries (1 files):
- languages-1205326-supplementary.pdf
