# Supplementary material for: Collaborative Multimodal Writing via Google Docs: Perceptions of French FL Learners
Source: MDPI journal article supplement (doi:10.3390/languages6030140), 2021-08-20
Supplement: s1 [file s1 › languages-1205326-supplementary.pdf]

### File S1. Pre-Task Questionnaire

The following questionnaire is designed for my dissertation study on collaborative multimodal writing. I would like to invite you to answer the following questions concerning your background information and your foreign language learning experiences. Please answer all questions to the best of your ability. All the data collected will be kept confidential and will be used for this research only. Thank you very much for your assistance!

#### Background Information

1. Name \_\_\_\_\_
2. Age \_\_\_\_\_
3. Gender \_\_\_\_\_
4. Ethnicity
  - ☐ White
  - ☐ Hispanic or Latino
  - ☐ Black or African American
  - ☐ Asian or Pacific Islander
  - ☐ Prefer not to answer
  - ☐ Other: \_\_\_\_\_
5. Academic program/Field of study/Major  
\_\_\_\_\_
6. Classification
  - ☐ Freshman/First-year
  - ☐ Sophomore
  - ☐ Junior
  - ☐ Senior
7. First language/mother tongue \_\_\_\_\_

#### Past Language Learning Experiences

8. Is this your first time studying French?
  - ☐ Yes
  - ☐ No
9. If you answered "No" to the preceding question, please indicate how long you studied French and where. Please ignore this question if you answered "Yes" to the preceding question.  
\_\_\_\_\_  
\_\_\_\_\_
10. Apart from French, have you ever taken any other foreign language class? Please indicate which one(s). Check all that apply.
  - ☐ Spanish
  - ☐ German

- ☐ Italian
- ☐ Chinese
- ☐ None of the above
- ☐ Other: \_\_\_\_\_

### Working with Technology

Please indicate which option that applies most to you in the following statements:

11. I feel comfortable using technology.

- ☐ very comfortable
- ☐ comfortable
- ☐ neutral
- ☐ uncomfortable
- ☐ very uncomfortable

12. I have engaged in at least one of the technological activities listed below (please check all that apply)

- ☐ Creating and sharing original content using social media (e.g., Facebook, Twitter, Instagram, etc.)comfortable
- ☐ Playing video games
- ☐ Creating a blog and/or vlog
- ☐ Creating or using animations such as Bitmoji, Gifs, memes etc.
- ☐ Using video/web-conferencing platforms such as Skype, zoom, WhatsApp etc.
- ☐ Other: \_\_\_\_\_

13. I have worked on a project using modes other than text (e.g., images, sounds, videos, animation) before.

- ☐ almost always
- ☐ often
- ☐ sometimes
- ☐ rarely
- ☐ never

14. Please briefly describe the project(s):

Please ignore this question if you answered "Never" to the preceding question.

---

### Working with Others

Please indicate which option that applies most to you in the following statements:

15. I prefer collaborating with others on a writing assignment to working alone.

- ☐ Strongly disagree
- ☐ Disagree
- ☐ Neutral
- ☐ Agree
- ☐ Strongly agree

16. I have worked on a paired/group writing project using Google Docs before.

- ☐ almost always
- ☐ often
- ☐ sometimes
- ☐ rarely
- ☐ never

17. Please briefly describe the project(s):

Please ignore this question if you answered "Never" to the preceding question.

---

18. Are you familiar with your partner for this project? If so, how long have known this person?

### **File S2. Post-Task Questionnaire**

Thank you very much for accepting to participate in my dissertation study. In this survey, I would like to know your perceptions about the collaborative multimodal task completed via Google Docs. Please carefully read the following statements and honestly indicate the extent to which you agree or disagree with each statement by rating it on the 5-point scale.

Thank you again for your time and sincere responses!

1. Name \_\_\_\_\_
2. I found Google Docs helpful for this collaborative multimodal writing project.
  - ☐ Strongly disagree
  - ☐ Disagree
  - ☐ Neutral
  - ☐ Agree
  - ☐ Strongly agree
3. I felt motivated to write more than I generally would in the French class.
  - ☐ Strongly disagree
  - ☐ Disagree
  - ☐ Neutral

- ☐ Agree
  - ☐ Strongly agree
4. Collaborative multimodal writing was particularly helpful in improving my writing skills in French in terms of:
- ☐ Spelling & Punctuation
    - ☐ Strongly disagree
    - ☐ Disagree
    - ☐ Neutral
    - ☐ Agree
    - ☐ Strongly agree
  - ☐ Word-choice & Vocabulary Expression
    - ☐ Strongly disagree
    - ☐ Disagree
    - ☐ Neutral
    - ☐ Agree
    - ☐ Strongly agree
  - ☐ Cultural Awareness
    - ☐ Strongly disagree
    - ☐ Disagree
    - ☐ Neutral
    - ☐ Agree
    - ☐ Strongly agree
  - ☐ Organizational & Structural Layout
    - ☐ Strongly disagree
    - ☐ Disagree
    - ☐ Neutral
    - ☐ Agree
    - ☐ Strongly agree
  - ☐ Visual Presentation
    - ☐ Strongly disagree
    - ☐ Disagree
    - ☐ Neutral
    - ☐ Agree
    - ☐ Strongly agree
  - ☐ Audience Awareness
    - ☐ Strongly disagree
    - ☐ Disagree

- ☐ Neutral
- ☐ Agree
- ☐ Strongly agree

5. I enjoyed working with my partner(s) on this collaborative multimodal project.

- ☐ Strongly disagree
- ☐ Disagree
- ☐ Neutral
- ☐ Agree
- ☐ Strongly agree

6. Both my partner(s) and I had equal opportunities to contribute to the final product.

- ☐ Strongly disagree
- ☐ Disagree
- ☐ Neutral
- ☐ Agree
- ☐ Strongly agree

7. After reflecting on the completed task, I do not think my partner (s) valued my contributions.

- ☐ Strongly disagree
- ☐ Disagree
- ☐ Neutral
- ☐ Agree
- ☐ Strongly agree

8. Compared to traditional individual writing, I prefer working with a partner(s) on multimodal writing projects like this in French.

- ☐ Strongly disagree
- ☐ Disagree
- ☐ Neutral
- ☐ Agree
- ☐ Strongly agree

9. I found peer assessment of the multimodal projects beneficial.

- ☐ Strongly disagree
- ☐ Disagree
- ☐ Neutral
- ☐ Agree
- ☐ Strongly agree

10. What is your overall perception of the peer assessment component of

this project?

- 
11. What is your overall impression of the paired multimodal writing project using Google Docs?

- 
12. What was your favorite part of the project? And why?

- 
13. What was your least favorite part of the project? And why?

- 
14. Any suggestions for improvement?
